# Supplementary material
Source: PubMed Central journal article supplement (PMC4433475)
Supplement: NIHMS678458-supplement-2.pdf [file NIHMS678458-supplement-2.pdf]

**Table S1**

Breakdown of alcohol abuse, alcohol dependence, drug abuse and drug dependence in the externalizing group of BPI Subjects in the entire Discovery and Validation sample.

| Externalizing disorder   | DSM-III-R diagnosis (BPI subjects in Waves 1-2, N=456) |      | DSM-IV diagnosis (BPI subjects in Waves 3-5, N=4465) |      |
|--------------------------|--------------------------------------------------------|------|------------------------------------------------------|------|
|                          | N                                                      | %    | N                                                    | %    |
| Alcohol abuse            | 30                                                     | 6.6  | 539                                                  | 12.1 |
| Alcohol dependence       | 177                                                    | 38.8 | 1354                                                 | 30.3 |
| Cannabis abuse           | 1                                                      | 0.2  | 409                                                  | 9.2  |
| Cannabis dependence      | 89                                                     | 19.5 | 717                                                  | 16.1 |
| Cocaine abuse            | 0                                                      | 0.0  | 137                                                  | 3.1  |
| Cocaine dependence       | 29                                                     | 6.4  | 480                                                  | 10.8 |
| Sedative abuse           | 2                                                      | 0.4  | 89                                                   | 2.0  |
| Sedative dependence      | 13                                                     | 2.9  | 146                                                  | 3.3  |
| Stimulant abuse          | 0                                                      | 0.0  | 167                                                  | 3.7  |
| Stimulant dependence     | 32                                                     | 7.0  | 283                                                  | 6.3  |
| Opioid abuse             | 1                                                      | 0.2  | 74                                                   | 1.7  |
| Opioid dependence        | 16                                                     | 3.5  | 173                                                  | 3.9  |
| Hallucinogen abuse       | 0                                                      | 0.0  | 73                                                   | 1.6  |
| Hallucinogen dependence  | 0                                                      | 0.0  | 55                                                   | 1.2  |
| Phencyclidine abuse      | 0                                                      | 0.0  | 25                                                   | 0.6  |
| Phencyclidine dependence | 0                                                      | 0.0  | 26                                                   | 0.6  |
| Polysubstance dependence | 0                                                      | 0.0  | 19                                                   | 0.4  |
| Other substance abuse    | 0                                                      | 0.0  | 25                                                   | 0.6  |

---

|                            |   |     |    |     |
|----------------------------|---|-----|----|-----|
| Other substance dependence | 0 | 0.0 | 26 | 0.6 |
|----------------------------|---|-----|----|-----|

---

**Table S2**

Clinical features in Discovery sample European Americans BPI subjects grouped by externalizing disorders (categorical parameters).

| <b>Non-Externalizing Group vs. Externalizing Group</b> |                          |          |                      |          |                 |                      |                          |                           |              |
|--------------------------------------------------------|--------------------------|----------|----------------------|----------|-----------------|----------------------|--------------------------|---------------------------|--------------|
| <b>Parameter</b>                                       | <b>Non-Externalizing</b> |          | <b>Externalizing</b> |          | $\chi^2$ (1 df) | <i>P</i> (two-sided) | <b>Odds Ratio: Value</b> | <b>Odds Ratio: 95% CI</b> |              |
|                                                        | <b>N</b>                 | <b>%</b> | <b>N</b>             | <b>%</b> |                 |                      |                          | <b>Lower</b>              | <b>Upper</b> |
| <b>Gender</b>                                          |                          |          |                      |          |                 |                      |                          |                           |              |
| Male                                                   | 164                      | 42.6     | 302                  | 53.4     | 10.615          | 0.001                | 0.649                    | 0.500                     | 0.842        |
| Female                                                 | 221                      | 57.4     | 264                  | 46.6     |                 |                      |                          |                           |              |
| <b>Disabled</b>                                        |                          |          |                      |          |                 |                      |                          |                           |              |
| Yes                                                    | 64                       | 16.9     | 138                  | 24.9     | 8.343           | 0.004                | 0.616                    | 0.443                     | 0.857        |
| No                                                     | 314                      | 83.1     | 417                  | 75.1     |                 |                      |                          |                           |              |
| <b>Self harm</b>                                       |                          |          |                      |          |                 |                      |                          |                           |              |
| Yes                                                    | 20                       | 10.4     | 89                   | 26.6     | 19.548          | <0.001               | 0.320                    | 0.190                     | 0.540        |
| No                                                     | 172                      | 89.6     | 245                  | 73.4     |                 |                      |                          |                           |              |
| <b>Rapid switching</b>                                 |                          |          |                      |          |                 |                      |                          |                           |              |
| Yes                                                    | 169                      | 47.2     | 336                  | 63.0     | 21.863          | <0.001               | 0.524                    | 0.399                     | 0.688        |

|                                                                 |     |      |     |      |        |        |       |       |       |
|-----------------------------------------------------------------|-----|------|-----|------|--------|--------|-------|-------|-------|
| No                                                              | 189 | 52.8 | 197 | 37.0 |        |        |       |       |       |
| <b>Rapid cycling</b>                                            |     |      |     |      |        |        |       |       |       |
| Yes                                                             | 152 | 43.9 | 314 | 60.2 | 22.024 | <0.001 | 0.519 | 0.394 | 0.683 |
| No                                                              | 194 | 56.1 | 208 | 39.8 |        |        |       |       |       |
| <b>Number of clean depressive episodes<sup>a</sup></b>          |     |      |     |      |        |        |       |       |       |
| 1 to 8                                                          | 222 | 65.5 | 271 | 52.0 | 15.235 | <0.001 | 1.750 | 1.320 | 2.321 |
| >8                                                              | 117 | 34.5 | 250 | 48.0 |        |        |       |       |       |
| <b>Number of clean depressive episodes per year<sup>a</sup></b> |     |      |     |      |        |        |       |       |       |
| 0 to 0.4                                                        | 191 | 57.4 | 238 | 46.8 | 9.049  | 0.003  | 1.532 | 1.159 | 2.023 |
| >0.4                                                            | 142 | 42.6 | 271 | 53.2 |        |        |       |       |       |
| <b>Number of clean manic episodes<sup>b</sup></b>               |     |      |     |      |        |        |       |       |       |
| 1 to 4                                                          | 211 | 58.6 | 230 | 44.0 | 18.266 | <0.001 | 1.804 | 1.375 | 2.367 |
| >4                                                              | 149 | 41.4 | 293 | 56.0 |        |        |       |       |       |

| <b>Number of clean manic episodes per year<sup>b</sup></b> |     |      |     |      |       |       |       |       |       |
|------------------------------------------------------------|-----|------|-----|------|-------|-------|-------|-------|-------|
| 0 to 0.4                                                   | 199 | 56.9 | 248 | 49.6 | 4.349 | 0.037 | 1.339 | 1.017 | 1.763 |
| >0.4                                                       | 151 | 43.1 | 252 | 50.4 |       |       |       |       |       |

  

| <b>Non-Externalizing Group vs. Early-Onset Subgroup</b> |                   |      |             |      |                 |               |                   |                    |       |
|---------------------------------------------------------|-------------------|------|-------------|------|-----------------|---------------|-------------------|--------------------|-------|
| Parameter                                               | Non-Externalizing |      | Early-Onset |      | $\chi^2$ (1 df) | P (two-sided) | Odds Ratio: Value | Odds Ratio: 95% CI |       |
|                                                         | N                 | %    | N           | %    |                 |               |                   | Lower              | Upper |
| <b>Gender</b>                                           |                   |      |             |      |                 |               |                   |                    |       |
| Male                                                    | 164               | 42.6 | 137         | 58.1 | 13.989          | <0.001        | 0.536             | 0.386              | 0.744 |
| Female                                                  | 221               | 57.4 | 99          | 41.9 |                 |               |                   |                    |       |
| <b>Disabled</b>                                         |                   |      |             |      |                 |               |                   |                    |       |
| Yes                                                     | 64                | 16.9 | 64          | 27.8 | 10.212          | 0.001         | 0.529             | 0.356              | 0.784 |
| No                                                      | 314               | 83.1 | 166         | 72.2 |                 |               |                   |                    |       |
| <b>Self harm</b>                                        |                   |      |             |      |                 |               |                   |                    |       |
| Yes                                                     | 20                | 10.4 | 52          | 34.9 | 30.191          | <0.001        | 0.217             | 0.122              | 0.385 |

|                                                                 |     |      |     |      |        |        |       |       |       |
|-----------------------------------------------------------------|-----|------|-----|------|--------|--------|-------|-------|-------|
| No                                                              | 172 | 89.6 | 97  | 65.1 |        |        |       |       |       |
| <b>Rapid switching</b>                                          |     |      |     |      |        |        |       |       |       |
| Yes                                                             | 169 | 47.2 | 160 | 72.1 | 34.513 | <0.001 | 0.346 | 0.242 | 0.496 |
| No                                                              | 189 | 52.8 | 62  | 27.9 |        |        |       |       |       |
| <b>Rapid cycling</b>                                            |     |      |     |      |        |        |       |       |       |
| Yes                                                             | 152 | 43.9 | 149 | 69.0 | 33.551 | <0.001 | 0.352 | 0.246 | 0.504 |
| No                                                              | 194 | 56.1 | 67  | 31.0 |        |        |       |       |       |
| <b>Number of clean depressive episodes<sup>a</sup></b>          |     |      |     |      |        |        |       |       |       |
| 1 to 8                                                          | 222 | 65.5 | 96  | 44.2 | 24.397 | <0.001 | 2.392 | 1.687 | 3.391 |
| >8                                                              | 117 | 34.5 | 121 | 55.8 |        |        |       |       |       |
| <b>Number of clean depressive episodes per year<sup>a</sup></b> |     |      |     |      |        |        |       |       |       |
| 0 to 0.4                                                        | 191 | 57.4 | 96  | 45.1 | 7.865  | 0.005  | 1.639 | 1.159 | 2.318 |
| >0.4                                                            | 142 | 42.6 | 117 | 54.9 |        |        |       |       |       |
| <b>Number of clean</b>                                          |     |      |     |      |        |        |       |       |       |

| <b>manic episodes<sup>b</sup></b>                                  |     |      |     |      |        |        |       |       |       |
|--------------------------------------------------------------------|-----|------|-----|------|--------|--------|-------|-------|-------|
| 1 to 4                                                             | 211 | 58.6 | 88  | 41.1 | 16.451 | <0.001 | 2.028 | 1.438 | 2.859 |
| >4                                                                 | 149 | 41.4 | 126 | 58.9 |        |        |       |       |       |
| <b>Number of clean<br/>manic episodes per<br/>year<sup>b</sup></b> |     |      |     |      |        |        |       |       |       |
| 0 to 0.4                                                           | 199 | 56.9 | 103 | 49.3 | 3.023  | 0.082  | 1.356 | 0.962 | 1.913 |
| >0.4                                                               | 151 | 43.1 | 106 | 50.7 |        |        |       |       |       |

a. According to the DSM-IV, a clean depressive episode is a depressive episode without prior physical illness, drug or alcohol abuse, organic precipitants, or bereavement.

b. According to the DSM-IV, a clean manic episode is a manic episode without prior physical illness, drug or alcohol abuse, or organic precipitants.

**Table S3**

Clinical features in Discovery sample European Americans BPI subjects grouped by externalizing disorders (continuous parameters).

---

**Non-Externalizing Group vs. Externalizing Group**


---

| Parameter                  | Non-Externalizing |       | Externalizing |       | <i>t</i> | <i>df</i> | <i>P</i> (two-sided) <sup>b</sup> |
|----------------------------|-------------------|-------|---------------|-------|----------|-----------|-----------------------------------|
|                            | Mean              | SD    | Mean          | SD    |          |           |                                   |
| Age                        | 44.07             | 13.81 | 41.08         | 12.09 | 3.427    | 744.401   | 0.001                             |
|                            | (N=382)           |       | (N=561)       |       |          |           |                                   |
| Years of school            | 15.37             | 2.80  | 14.45         | 2.85  | 4.911    | 934       | <0.001                            |
|                            | (N=379)           |       | (N=557)       |       |          |           |                                   |
| Age at onset of illness    | 21.38             | 10.13 | 17.91         | 7.82  | 5.498    | 632.854   | <0.001                            |
|                            | (N=360)           |       | (N=544)       |       |          |           |                                   |
| Age at onset of depression | 22.06             | 11.00 | 18.96         | 9.44  | 4.318    | 661.793   | <0.001                            |
|                            | (N=348)           |       | (N=531)       |       |          |           |                                   |
| Age at onset of mania      | 26.53             | 11.67 | 22.99         | 9.56  | 4.805    | 685.743   | <0.001                            |
|                            | (N=368)           |       | (N=528)       |       |          |           |                                   |
| Age of first drink         | 16.60             | 4.47  | 13.96         | 4.69  | 5.369    | 390       | <0.001                            |
|                            | (N=136)           |       | (N=256)       |       |          |           |                                   |
| Age of first tobacco use   | 16.04             | 5.21  | 14.64         | 4.73  | 3.353    | 631       | 0.001                             |

---



|                                                         | (N=197)           |       | (N=436)     |       |          |           |                                   |
|---------------------------------------------------------|-------------------|-------|-------------|-------|----------|-----------|-----------------------------------|
| Number of suicide attempts                              | 2.52              | 2.39  | 3.10        | 3.84  | -1.848   | 353.024   | 0.065                             |
|                                                         | (N=122)           |       | (N=277)     |       |          |           |                                   |
| Age of first suicide attempt                            | 24.49             | 10.49 | 21.48       | 8.43  | 2.217    | 221       | 0.028                             |
|                                                         | (N=61)            |       | (N=162)     |       |          |           |                                   |
| Interepisode GAS <sup>a</sup>                           | 75.32             | 14.98 | 70.85       | 14.11 | 3.081    | 403       | 0.002                             |
|                                                         | (N=179)           |       | (N=226)     |       |          |           |                                   |
| <b>Non-Externalizing Group vs. Early-Onset Subgroup</b> |                   |       |             |       |          |           |                                   |
| Parameter                                               | Non-Externalizing |       | Early-Onset |       | <i>t</i> | <i>df</i> | <i>P</i> (two-sided) <sup>b</sup> |
|                                                         | Mean              | SD    | Mean        | SD    |          |           |                                   |
| Age                                                     | 44.07             | 13.81 | 39.97       | 11.44 | 3.991    | 563.516   | <0.001                            |
|                                                         | (N=382)           |       | (N=235)     |       |          |           |                                   |
| Years of school                                         | 15.37             | 2.80  | 13.79       | 2.87  | 6.742    | 609       | <0.001                            |
|                                                         | (N=379)           |       | (N=232)     |       |          |           |                                   |
| Age at onset of illness                                 | 21.38             | 10.13 | 16.28       | 7.24  | 7.115    | 579.210   | <0.001                            |
|                                                         | (N=360)           |       | (N=229)     |       |          |           |                                   |
| Age at onset of depression                              | 22.06             | 11.00 | 17.03       | 8.91  | 5.994    | 538.732   | <0.001                            |

|                               |         |       |         |       |        |         |        |
|-------------------------------|---------|-------|---------|-------|--------|---------|--------|
|                               | (N=348) |       | (N=223) |       |        |         |        |
| Age at onset of mania         | 26.53   | 11.67 | 20.92   | 8.66  | 6.644  | 557.345 | <0.001 |
|                               | (N=368) |       | (N=219) |       |        |         |        |
| Age of first drink            | 16.60   | 4.47  | 12.76   | 3.92  | 7.172  | 249     | <0.001 |
|                               | (N=136) |       | (N=115) |       |        |         |        |
| Age of first tobacco use      | 16.04   | 5.21  | 13.39   | 4.42  | 5.379  | 385     | <0.001 |
|                               | (N=197) |       | (N=190) |       |        |         |        |
| Number of suicide attempts    | 2.52    | 2.39  | 3.43    | 4.33  | -2.061 | 197.795 | 0.041  |
|                               | (N=122) |       | (N=127) |       |        |         |        |
| Age of first suicide attempt  | 24.49   | 10.49 | 20.89   | 8.57  | 2.209  | 135     | 0.029  |
|                               | (N=61)  |       | (N=76)  |       |        |         |        |
| Interepisode GAS <sup>a</sup> | 75.32   | 14.98 | 69.85   | 14.21 | 2.853  | 265     | 0.005  |
|                               | (N=179) |       | (N=88)  |       |        |         |        |

a. GAS, Global Assessment Scale.

b. *P*-values were determined after performing Levene's Test for Equality of Variances to check equality of variances assumption.

**Table S4**

Clinical features in Discovery sample African Americans BPI subjects grouped by externalizing disorders (categorical parameters).

| <b>Non-Externalizing Group vs. Externalizing Group</b> |                          |          |                      |          |                 |                      |                          |                           |              |
|--------------------------------------------------------|--------------------------|----------|----------------------|----------|-----------------|----------------------|--------------------------|---------------------------|--------------|
| <b>Parameter</b>                                       | <b>Non-Externalizing</b> |          | <b>Externalizing</b> |          | $\chi^2$ (1 df) | <i>P</i> (two-sided) | <b>Odds Ratio: Value</b> | <b>Odds Ratio: 95% CI</b> |              |
|                                                        | <b>N</b>                 | <b>%</b> | <b>N</b>             | <b>%</b> |                 |                      |                          | <b>Lower</b>              | <b>Upper</b> |
| <b>Gender</b>                                          |                          |          |                      |          |                 |                      |                          |                           |              |
| Male                                                   | 21                       | 24.1     | 79                   | 34.3     | 3.047           | 0.081                | 0.608                    | 0.347                     | 1.066        |
| Female                                                 | 66                       | 75.9     | 151                  | 65.7     |                 |                      |                          |                           |              |
| <b>Disabled</b>                                        |                          |          |                      |          |                 |                      |                          |                           |              |
| Yes                                                    | 28                       | 38.9     | 70                   | 33.3     | 0.730           | 0.393                | 1.273                    | 0.731                     | 2.215        |
| No                                                     | 44                       | 61.1     | 140                  | 66.7     |                 |                      |                          |                           |              |
| <b>Self harm</b>                                       |                          |          |                      |          |                 |                      |                          |                           |              |
| Yes                                                    | 5                        | 8.5      | 33                   | 24.3     | 6.539           | 0.011                | 0.289                    | 0.107                     | 0.783        |
| No                                                     | 54                       | 91.5     | 103                  | 75.7     |                 |                      |                          |                           |              |
| <b>Rapid switching</b>                                 |                          |          |                      |          |                 |                      |                          |                           |              |
| Yes                                                    | 36                       | 56.2     | 98                   | 62.0     | 0.635           | 0.426                | 0.787                    | 0.437                     | 1.419        |

|                                                                 |    |      |     |      |       |       |       |       |       |
|-----------------------------------------------------------------|----|------|-----|------|-------|-------|-------|-------|-------|
| No                                                              | 28 | 43.8 | 60  | 38.0 |       |       |       |       |       |
| <b>Rapid cycling</b>                                            |    |      |     |      |       |       |       |       |       |
| Yes                                                             | 30 | 48.4 | 89  | 61.4 | 3.000 | 0.083 | 0.590 | 0.324 | 1.075 |
| No                                                              | 32 | 51.6 | 56  | 38.6 |       |       |       |       |       |
| <b>Number of clean depressive episodes<sup>a</sup></b>          |    |      |     |      |       |       |       |       |       |
| 1 to 8                                                          | 45 | 60.0 | 93  | 46.5 | 3.976 | 0.046 | 1.726 | 1.007 | 2.959 |
| >8                                                              | 30 | 40.0 | 107 | 53.5 |       |       |       |       |       |
| <b>Number of clean depressive episodes per year<sup>a</sup></b> |    |      |     |      |       |       |       |       |       |
| 0 to 0.4                                                        | 33 | 45.8 | 79  | 42.2 | 0.273 | 0.602 | 1.157 | 0.669 | 1.999 |
| >0.4                                                            | 39 | 54.2 | 108 | 57.8 |       |       |       |       |       |
| <b>Number of clean manic episodes<sup>b</sup></b>               |    |      |     |      |       |       |       |       |       |
| 1 to 4                                                          | 43 | 51.2 | 113 | 52.8 | 0.063 | 0.802 | 0.937 | 0.566 | 1.563 |
| >4                                                              | 41 | 48.8 | 101 | 47.2 |       |       |       |       |       |

| <b>Number of clean manic episodes per year<sup>b</sup></b> |    |      |     |      |       |       |       |       |       |
|------------------------------------------------------------|----|------|-----|------|-------|-------|-------|-------|-------|
| 0 to 0.4                                                   | 41 | 50.6 | 97  | 49.0 | 0.061 | 0.805 | 1.067 | 0.636 | 1.790 |
| >0.4                                                       | 40 | 49.4 | 101 | 51.0 |       |       |       |       |       |

  

| <b>Non-Externalizing Group vs. Early-Onset Subgroup</b> |                   |      |             |      |                 |               |                   |                    |       |
|---------------------------------------------------------|-------------------|------|-------------|------|-----------------|---------------|-------------------|--------------------|-------|
| Parameter                                               | Non-Externalizing |      | Early-Onset |      | $\chi^2$ (1 df) | P (two-sided) | Odds Ratio: Value | Odds Ratio: 95% CI |       |
|                                                         | N                 | %    | N           | %    |                 |               |                   | Lower              | Upper |
| <b>Gender</b>                                           |                   |      |             |      |                 |               |                   |                    |       |
| Male                                                    | 21                | 24.1 | 35          | 37.6 | 3.820           | 0.051         | 0.527             | 0.276              | 1.006 |
| Female                                                  | 66                | 75.9 | 58          | 62.4 |                 |               |                   |                    |       |
| <b>Disabled</b>                                         |                   |      |             |      |                 |               |                   |                    |       |
| Yes                                                     | 28                | 38.9 | 33          | 35.5 | 0.202           | 0.653         | 1.157             | 0.612              | 2.186 |
| No                                                      | 44                | 61.1 | 60          | 64.5 |                 |               |                   |                    |       |
| <b>Self harm</b>                                        |                   |      |             |      |                 |               |                   |                    |       |
| Yes                                                     | 5                 | 8.5  | 21          | 26.6 | 7.243           | 0.007         | 0.256             | 0.090              | 0.726 |

|                                                                 |    |      |    |      |       |       |       |       |       |
|-----------------------------------------------------------------|----|------|----|------|-------|-------|-------|-------|-------|
| No                                                              | 54 | 91.5 | 58 | 73.4 |       |       |       |       |       |
| <b>Rapid switching</b>                                          |    |      |    |      |       |       |       |       |       |
| Yes                                                             | 36 | 56.2 | 58 | 66.7 | 1.703 | 0.192 | 0.643 | 0.331 | 1.250 |
| No                                                              | 28 | 43.8 | 29 | 33.3 |       |       |       |       |       |
| <b>Rapid cycling</b>                                            |    |      |    |      |       |       |       |       |       |
| Yes                                                             | 30 | 48.4 | 52 | 65.8 | 4.340 | 0.037 | 0.487 | 0.246 | 0.962 |
| No                                                              | 32 | 51.6 | 27 | 34.2 |       |       |       |       |       |
| <b>Number of clean depressive episodes<sup>a</sup></b>          |    |      |    |      |       |       |       |       |       |
| 1 to 8                                                          | 45 | 60.0 | 34 | 41.0 | 5.711 | 0.017 | 2.162 | 1.144 | 4.084 |
| >8                                                              | 30 | 40.0 | 49 | 59.0 |       |       |       |       |       |
| <b>Number of clean depressive episodes per year<sup>a</sup></b> |    |      |    |      |       |       |       |       |       |
| 0 to 0.4                                                        | 33 | 45.8 | 34 | 43.0 | 0.119 | 0.730 | 1.120 | 0.589 | 2.130 |
| >0.4                                                            | 39 | 54.2 | 45 | 57.0 |       |       |       |       |       |
| <b>Number of clean</b>                                          |    |      |    |      |       |       |       |       |       |

| <b>manic episodes<sup>b</sup></b>                                  |    |      |    |      |       |       |       |       |       |
|--------------------------------------------------------------------|----|------|----|------|-------|-------|-------|-------|-------|
| 1 to 4                                                             | 43 | 51.2 | 48 | 53.9 | 0.130 | 0.718 | 0.896 | 0.493 | 1.628 |
| >4                                                                 | 41 | 48.8 | 41 | 46.1 |       |       |       |       |       |
| <b>Number of clean<br/>manic episodes per<br/>year<sup>b</sup></b> |    |      |    |      |       |       |       |       |       |
| 0 to 0.4                                                           | 41 | 50.6 | 41 | 50.0 | 0.006 | 0.937 | 1.025 | 0.555 | 1.894 |
| >0.4                                                               | 40 | 49.4 | 41 | 50.0 |       |       |       |       |       |

a. According to the DSM-IV, a clean depressive episode is a depressive episode without prior physical illness, drug or alcohol abuse, organic precipitants, or bereavement.

b. According to the DSM-IV, a clean manic episode is a manic episode without prior physical illness, drug or alcohol abuse, or organic precipitants.

**Table S5**

Clinical features in Discovery sample African Americans BPI subjects grouped by externalizing disorders (continuous parameters).

**Non-Externalizing Group vs. Externalizing Group**

| Parameter                  | Non-Externalizing |       | Externalizing    |       | <i>t</i> | <i>df</i> | <i>P</i> (two-sided) <sup>b</sup> |
|----------------------------|-------------------|-------|------------------|-------|----------|-----------|-----------------------------------|
|                            | Mean              | SD    | Mean             | SD    |          |           |                                   |
| Age                        | 43.78<br>(N=85)   | 12.02 | 41.00<br>(N=221) | 9.93  | 1.895    | 130.464   | 0.060                             |
| Years of school            | 14.16<br>(N=73)   | 2.70  | 13.01<br>(N=210) | 2.53  | 3.289    | 281       | 0.001                             |
| Age at onset of illness    | 21.29<br>(N=87)   | 9.02  | 16.12<br>(N=230) | 8.11  | 4.905    | 315       | <0.001                            |
| Age at onset of depression | 21.34<br>(N=77)   | 9.25  | 17.28<br>(N=215) | 9.44  | 3.251    | 290       | 0.001                             |
| Age at onset of mania      | 26.95<br>(N=84)   | 10.89 | 22.46<br>(N=222) | 10.49 | 3.305    | 304       | 0.001                             |
| Age of first drink         | 17.00<br>(N=61)   | 5.13  | 14.22<br>(N=166) | 5.17  | 3.603    | 225       | <0.001                            |
| Age of first tobacco use   | 16.00             | 5.96  | 15.65            | 6.48  | 0.327    | 188       | 0.744                             |



|                                                         | (N=47)            |       | (N=143)     |       |          |           |                                   |
|---------------------------------------------------------|-------------------|-------|-------------|-------|----------|-----------|-----------------------------------|
| Number of suicide attempts                              | 3.18              | 3.33  | 4.61        | 7.14  | -0.916   | 123       | 0.361                             |
|                                                         | (N=22)            |       | (N=103)     |       |          |           |                                   |
| Age of first suicide attempt                            | 24.31             | 9.86  | 20.73       | 8.52  | 1.351    | 78        | 0.181                             |
|                                                         | (N=13)            |       | (N=67)      |       |          |           |                                   |
| Interepisode GAS <sup>a</sup>                           | 75.11             | 14.98 | 66.50       | 16.78 | 2.184    | 69        | 0.032                             |
|                                                         | (N=27)            |       | (N=44)      |       |          |           |                                   |
| <b>Non-Externalizing Group vs. Early-Onset Subgroup</b> |                   |       |             |       |          |           |                                   |
| Parameter                                               | Non-Externalizing |       | Early-Onset |       | <i>t</i> | <i>df</i> | <i>P</i> (two-sided) <sup>b</sup> |
|                                                         | Mean              | SD    | Mean        | SD    |          |           |                                   |
| Age                                                     | 43.78             | 12.02 | 39.38       | 9.80  | 2.645    | 162.209   | 0.009                             |
|                                                         | (N=85)            |       | (N=90)      |       |          |           |                                   |
| Years of school                                         | 14.16             | 2.70  | 12.59       | 2.52  | 3.869    | 164       | <0.001                            |
|                                                         | (N=73)            |       | (N=93)      |       |          |           |                                   |
| Age at onset of illness                                 | 21.29             | 9.02  | 15.42       | 8.28  | 4.550    | 178       | <0.001                            |
|                                                         | (N=87)            |       | (N=93)      |       |          |           |                                   |
| Age at onset of depression                              | 21.34             | 9.25  | 16.66       | 9.61  | 3.179    | 164       | 0.002                             |

|                               |        |       |        |       |        |     |        |
|-------------------------------|--------|-------|--------|-------|--------|-----|--------|
|                               | (N=77) |       | (N=89) |       |        |     |        |
| Age at onset of mania         | 26.95  | 10.89 | 22.19  | 11.18 | 2.843  | 172 | 0.005  |
|                               | (N=84) |       | (N=90) |       |        |     |        |
| Age of first drink            | 17.00  | 5.13  | 13.26  | 4.79  | 4.580  | 150 | <0.001 |
|                               | (N=61) |       | (N=91) |       |        |     |        |
| Age of first tobacco use      | 16.00  | 5.96  | 15.52  | 7.24  | 0.385  | 124 | 0.701  |
|                               | (N=47) |       | (N=79) |       |        |     |        |
| Number of suicide attempts    | 3.18   | 3.33  | 4.13   | 4.14  | -0.955 | 74  | 0.343  |
|                               | (N=22) |       | (N=54) |       |        |     |        |
| Age of first suicide attempt  | 24.31  | 9.86  | 19.13  | 8.47  | 1.833  | 50  | 0.073  |
|                               | (N=13) |       | (N=39) |       |        |     |        |
| Interepisode GAS <sup>a</sup> | 75.11  | 14.98 | 66.80  | 17.78 | 1.737  | 45  | 0.089  |
|                               | (N=27) |       | (N=20) |       |        |     |        |

a. GAS, Global Assessment Scale.

b. *P*-values were determined after performing Levene's Test for Equality of Variances to check equality of variances assumption.

**Table S6**

Clinical features in Validation sample BPI subjects grouped by externalizing disorders (categorical parameters).

| <b>Non-Externalizing Group vs. Externalizing Group</b> |                          |          |                      |          |                                   |                             |                          |                           |              |
|--------------------------------------------------------|--------------------------|----------|----------------------|----------|-----------------------------------|-----------------------------|--------------------------|---------------------------|--------------|
| <b>Parameter</b>                                       | <b>Non-Externalizing</b> |          | <b>Externalizing</b> |          | <b><math>\chi^2</math> (1 df)</b> | <b><i>P</i> (two-sided)</b> | <b>Odds Ratio: Value</b> | <b>Odds Ratio: 95% CI</b> |              |
|                                                        | <b>N</b>                 | <b>%</b> | <b>N</b>             | <b>%</b> |                                   |                             |                          | <b>Lower</b>              | <b>Upper</b> |
| <b>Gender</b>                                          |                          |          |                      |          |                                   |                             |                          |                           |              |
| Male                                                   | 120                      | 27.5     | 303                  | 37.8     | 13.323                            | <0.001                      | 0.624                    | 0.484                     | 0.805        |
| Female                                                 | 316                      | 72.5     | 498                  | 62.2     |                                   |                             |                          |                           |              |
| <b>Disabled</b>                                        |                          |          |                      |          |                                   |                             |                          |                           |              |
| Yes                                                    | 123                      | 28.7     | 282                  | 35.8     | 6.334                             | 0.012                       | 0.721                    | 0.559                     | 0.931        |
| No                                                     | 306                      | 71.3     | 506                  | 64.2     |                                   |                             |                          |                           |              |
| <b>Self harm</b>                                       |                          |          |                      |          |                                   |                             |                          |                           |              |
| Yes                                                    | 53                       | 21.3     | 159                  | 35.4     | 15.115                            | <0.001                      | 0.493                    | 0.344                     | 0.707        |
| No                                                     | 196                      | 78.7     | 290                  | 64.6     |                                   |                             |                          |                           |              |
| <b>Rapid switching</b>                                 |                          |          |                      |          |                                   |                             |                          |                           |              |
| Yes                                                    | 222                      | 53.9     | 526                  | 68.2     | 23.748                            | <0.001                      | 0.544                    | 0.426                     | 0.696        |

|                                                                 |     |      |     |      |        |        |       |       |       |
|-----------------------------------------------------------------|-----|------|-----|------|--------|--------|-------|-------|-------|
| No                                                              | 190 | 46.1 | 245 | 31.8 |        |        |       |       |       |
| <b>Rapid cycling</b>                                            |     |      |     |      |        |        |       |       |       |
| Yes                                                             | 219 | 54.5 | 495 | 66.4 | 15.670 | <0.001 | 0.607 | 0.473 | 0.778 |
| No                                                              | 183 | 45.5 | 251 | 33.6 |        |        |       |       |       |
| <b>Number of clean depressive episodes<sup>a</sup></b>          |     |      |     |      |        |        |       |       |       |
| 1 to 8                                                          | 214 | 55.9 | 331 | 45.0 | 11.844 | 0.001  | 1.546 | 1.205 | 1.982 |
| >8                                                              | 169 | 44.1 | 404 | 55.0 |        |        |       |       |       |
| <b>Number of clean depressive episodes per year<sup>a</sup></b> |     |      |     |      |        |        |       |       |       |
| 0 to 0.4                                                        | 192 | 51.3 | 307 | 42.8 | 7.188  | 0.007  | 1.409 | 1.096 | 1.811 |
| >0.4                                                            | 182 | 48.7 | 410 | 57.2 |        |        |       |       |       |
| <b>Number of clean manic episodes<sup>b</sup></b>               |     |      |     |      |        |        |       |       |       |
| 1 to 4                                                          | 227 | 54.4 | 282 | 37.6 | 30.891 | <0.001 | 1.983 | 1.555 | 2.528 |
| >4                                                              | 190 | 45.6 | 468 | 62.4 |        |        |       |       |       |

| <b>Number of clean manic episodes per year<sup>b</sup></b> |     |      |     |      |       |       |       |       |       |
|------------------------------------------------------------|-----|------|-----|------|-------|-------|-------|-------|-------|
| 0 to 0.4                                                   | 219 | 53.2 | 348 | 47.5 | 3.324 | 0.068 | 1.252 | 0.983 | 1.595 |
| >0.4                                                       | 193 | 46.8 | 384 | 52.5 |       |       |       |       |       |

  

| <b>Non-Externalizing Group vs. Early-Onset Subgroup</b> |                   |      |             |      |                 |               |                   |                    |       |
|---------------------------------------------------------|-------------------|------|-------------|------|-----------------|---------------|-------------------|--------------------|-------|
| Parameter                                               | Non-Externalizing |      | Early-Onset |      | $\chi^2$ (1 df) | P (two-sided) | Odds Ratio: Value | Odds Ratio: 95% CI |       |
|                                                         | N                 | %    | N           | %    |                 |               |                   | Lower              | Upper |
| <b>Gender</b>                                           |                   |      |             |      |                 |               |                   |                    |       |
| Male                                                    | 120               | 27.5 | 127         | 41.4 | 15.561          | <0.001        | 0.538             | 0.395              | 0.733 |
| Female                                                  | 316               | 72.5 | 180         | 58.6 |                 |               |                   |                    |       |
| <b>Disabled</b>                                         |                   |      |             |      |                 |               |                   |                    |       |
| Yes                                                     | 123               | 28.7 | 114         | 37.5 | 6.339           | 0.012         | 0.670             | 0.490              | 0.916 |
| No                                                      | 306               | 71.3 | 190         | 62.5 |                 |               |                   |                    |       |
| <b>Self harm</b>                                        |                   |      |             |      |                 |               |                   |                    |       |
| Yes                                                     | 53                | 21.3 | 79          | 45.1 | 27.284          | <0.001        | 0.329             | 0.215              | 0.503 |

|                                                                 |     |      |     |      |        |        |       |       |       |
|-----------------------------------------------------------------|-----|------|-----|------|--------|--------|-------|-------|-------|
| No                                                              | 196 | 78.7 | 96  | 54.9 |        |        |       |       |       |
| <b>Rapid switching</b>                                          |     |      |     |      |        |        |       |       |       |
| Yes                                                             | 222 | 53.9 | 227 | 74.9 | 33.064 | <0.001 | 0.391 | 0.283 | 0.541 |
| No                                                              | 190 | 46.1 | 76  | 25.1 |        |        |       |       |       |
| <b>Rapid cycling</b>                                            |     |      |     |      |        |        |       |       |       |
| Yes                                                             | 219 | 54.5 | 206 | 70.1 | 17.360 | <0.001 | 0.511 | 0.372 | 0.702 |
| No                                                              | 183 | 45.5 | 88  | 29.9 |        |        |       |       |       |
| <b>Number of clean depressive episodes<sup>a</sup></b>          |     |      |     |      |        |        |       |       |       |
| 1 to 8                                                          | 214 | 55.9 | 112 | 40.0 | 16.309 | <0.001 | 1.899 | 1.389 | 2.597 |
| >8                                                              | 169 | 44.1 | 168 | 60.0 |        |        |       |       |       |
| <b>Number of clean depressive episodes per year<sup>a</sup></b> |     |      |     |      |        |        |       |       |       |
| 0 to 0.4                                                        | 192 | 51.3 | 102 | 37.5 | 12.158 | <0.001 | 1.758 | 1.279 | 2.417 |
| >0.4                                                            | 182 | 48.7 | 170 | 62.5 |        |        |       |       |       |
| <b>Number of clean</b>                                          |     |      |     |      |        |        |       |       |       |

| <b>manic episodes<sup>b</sup></b>                                  |     |      |     |      |        |        |       |       |       |
|--------------------------------------------------------------------|-----|------|-----|------|--------|--------|-------|-------|-------|
| 1 to 4                                                             | 227 | 54.4 | 104 | 35.6 | 24.439 | <0.001 | 2.160 | 1.588 | 2.937 |
| >4                                                                 | 190 | 45.6 | 188 | 64.4 |        |        |       |       |       |
| <b>Number of clean<br/>manic episodes per<br/>year<sup>b</sup></b> |     |      |     |      |        |        |       |       |       |
| 0 to 0.4                                                           | 219 | 53.2 | 131 | 45.2 | 4.339  | 0.037  | 1.377 | 1.019 | 1.862 |
| >0.4                                                               | 193 | 46.8 | 159 | 54.8 |        |        |       |       |       |

a. According to the DSM-IV, a clean depressive episode is a depressive episode without prior physical illness, drug or alcohol abuse, organic precipitants, or bereavement.

b. According to the DSM-IV, a clean manic episode is a manic episode without prior physical illness, drug or alcohol abuse, or organic precipitants.

**Table S7**

Clinical features in Validation sample BPI subjects grouped by externalizing disorders (continuous parameters).

**Non-Externalizing Group vs. Externalizing Group**

| Parameter                  | Non-Externalizing |       | Externalizing    |       | <i>t</i> | <i>df</i> | <i>P</i> (two-sided) <sup>b</sup> |
|----------------------------|-------------------|-------|------------------|-------|----------|-----------|-----------------------------------|
|                            | Mean              | SD    | Mean             | SD    |          |           |                                   |
| Age                        | 44.77<br>(N=433)  | 13.50 | 42.07<br>(N=793) | 11.92 | 3.484    | 799.036   | 0.001                             |
| Years of school            | 15.56<br>(N=427)  | 2.62  | 14.61<br>(N=780) | 2.62  | 6.038    | 1205      | <0.001                            |
| Age at onset of illness    | 20.36<br>(N=434)  | 9.18  | 16.96<br>(N=801) | 8.42  | 6.382    | 824.447   | <0.001                            |
| Age at onset of depression | 21.38<br>(N=402)  | 10.99 | 18.09<br>(N=777) | 9.67  | 5.071    | 726.566   | <0.001                            |
| Age at onset of mania      | 26.18<br>(N=428)  | 11.33 | 22.97<br>(N=786) | 9.55  | 4.974    | 759.830   | <0.001                            |
| Age of first drink         | 16.12<br>(N=398)  | 5.30  | 14.36<br>(N=773) | 4.35  | 5.719    | 677.399   | <0.001                            |
| Age of first tobacco use   | 16.29             | 4.81  | 15.23            | 5.45  | 2.874    | 976       | 0.004                             |



|                                                         | (N=288)           |       | (N=690)     |       |          |           |                                   |
|---------------------------------------------------------|-------------------|-------|-------------|-------|----------|-----------|-----------------------------------|
| Number of suicide attempts                              | 2.33              | 2.40  | 3.32        | 5.07  | -3.148   | 558.586   | 0.002                             |
|                                                         | (N=166)           |       | (N=406)     |       |          |           |                                   |
| Age of first suicide attempt                            | 24.57             | 12.09 | 21.80       | 9.63  | 1.886    | 117.298   | 0.062                             |
|                                                         | (N=82)            |       | (N=245)     |       |          |           |                                   |
| Interepisode GAS <sup>a</sup>                           | 73.40             | 13.32 | 69.82       | 13.77 | 2.875    | 491       | 0.004                             |
|                                                         | (N=203)           |       | (N=290)     |       |          |           |                                   |
| <b>Non-Externalizing Group vs. Early-Onset Subgroup</b> |                   |       |             |       |          |           |                                   |
| Parameter                                               | Non-Externalizing |       | Early-Onset |       | <i>t</i> | <i>df</i> | <i>P</i> (two-sided) <sup>b</sup> |
|                                                         | Mean              | SD    | Mean        | SD    |          |           |                                   |
| Age                                                     | 44.77             | 13.50 | 40.74       | 11.43 | 4.381    | 713.448   | <0.001                            |
|                                                         | (N=433)           |       | (N=306)     |       |          |           |                                   |
| Years of school                                         | 15.56             | 2.62  | 14.00       | 2.61  | 7.897    | 723       | <0.001                            |
|                                                         | (N=427)           |       | (N=298)     |       |          |           |                                   |
| Age at onset of illness                                 | 20.36             | 9.18  | 15.43       | 8.02  | 7.748    | 706.946   | <0.001                            |
|                                                         | (N=434)           |       | (N=307)     |       |          |           |                                   |
| Age at onset of depression                              | 21.38             | 10.99 | 16.67       | 9.54  | 6.049    | 677.437   | <0.001                            |

|                               |         |       |         |       |        |         |        |
|-------------------------------|---------|-------|---------|-------|--------|---------|--------|
|                               | (N=402) |       | (N=296) |       |        |         |        |
| Age at onset of mania         | 26.18   | 11.33 | 21.37   | 9.35  | 6.293  | 717.083 | <0.001 |
|                               | (N=428) |       | (N=306) |       |        |         |        |
| Age of first drink            | 16.12   | 5.30  | 13.49   | 4.18  | 7.144  | 701     | <0.001 |
|                               | (N=398) |       | (N=305) |       |        |         |        |
| Age of first tobacco use      | 16.29   | 4.81  | 13.81   | 4.94  | 6.025  | 560     | <0.001 |
|                               | (N=288) |       | (N=274) |       |        |         |        |
| Number of suicide attempts    | 2.33    | 2.40  | 4.25    | 7.15  | -3.350 | 214.744 | 0.001  |
|                               | (N=166) |       | (N=175) |       |        |         |        |
| Age of first suicide attempt  | 24.57   | 12.09 | 20.01   | 9.17  | 2.886  | 143.221 | 0.005  |
|                               | (N=82)  |       | (N=117) |       |        |         |        |
| Interepisode GAS <sup>a</sup> | 73.40   | 13.32 | 69.01   | 13.36 | 2.756  | 308     | 0.006  |
|                               | (N=203) |       | (N=107) |       |        |         |        |

a. GAS, Global Assessment Scale.

b. *P*-values were determined after performing Levene's Test for Equality of Variances to check equality of variances assumption.
